# Supplementary material for: From molecular design to antiepileptic evaluation: sulfonamide–pyrazole derivatives as promising neuroactive agents
Source: Royal Society of Chemistry journal article supplement (doi:10.1039/d6ra01165a), 2026-05-26
Supplement: d6ra01165a1.pdf [file d6ra01165a1.pdf]

# Supplementary data

## From Molecular Design to Antiepileptic Evaluation: Sulfonamide–Pyrazole Derivatives as Promising Neuroactive Agents

Mohamed K. Elgohary<sup>a, \*</sup>, Mahmoud Abdelrahman Alkabbani<sup>b</sup>, Aya Mohamed Ahmed Ibrahim<sup>c</sup>, Ahmed Elsonbaty<sup>a</sup>, Abdelhameed Abubakr<sup>d</sup>, Mayada H. Mohamed<sup>e</sup>, Abdulrahman A. Almehizia<sup>f</sup>, Ahmed M. Naglah<sup>f, \*</sup>, Mohamed Fares <sup>a, g</sup>, Hatem A. Abdel-Aziz<sup>h</sup>

<sup>a</sup> *Pharmaceutical Chemistry Department, Faculty of Pharmacy, Egyptian Russian University, Badr City, Cairo, 11829, Egypt*

<sup>b</sup> *Pharmacology and Toxicology Department, Faculty of Pharmacy, Egyptian-Russian University, Badr City, Cairo, 11829, Egypt*

<sup>c</sup> *Department of Biochemistry, Faculty of Pharmacy, Egyptian Russian University, Badr City, Cairo, Egypt.*

<sup>d</sup> *Department of Pharmaceutics and Pharmaceutical Technology, Egyptian Russian University, Badr City, Cairo, Egypt.*

<sup>e</sup> *University Family Medicine Center, Department of Family and Community Medicine, College of Medicine, King Saud University Medical City, P.O. Box 2925, Riyadh 11472, Saudi Arabia.*

<sup>f</sup> *Drug Exploration and Development Chair (DEDC), Department of Pharmaceutical Chemistry, College of Pharmacy, King Saud University, P.O. Box 2457, Riyadh 11451, Saudi Arabia.*

<sup>g</sup> *School of Pharmacy, The University of Sydney, Sydney, NSW, 2006, Australia*

<sup>h</sup> *Applied Organic Chemistry Department, National Research Center, Dokki, Cairo, 12622, Egypt*

**\*Corresponding author:** [mohamed-elgohary@eru.edu.eg](mailto:mohamed-elgohary@eru.edu.eg), [anaglah@ksu.edu.sa](mailto:anaglah@ksu.edu.sa),

# *Toxicity impact*

## ProTox-3.0 - Prediction of TOXicity of chemicals

| Classification                             | Target                                                                                 | Shorthand     | Prediction | Probability |
|--------------------------------------------|----------------------------------------------------------------------------------------|---------------|------------|-------------|
| Organ toxicity                             | Hepatotoxicity                                                                         | dili          | Inactive   | 0.50        |
| Organ toxicity                             | Neurotoxicity                                                                          | neuro         | Inactive   | 0.72        |
| Organ toxicity                             | Nephrotoxicity                                                                         | nephro        | Active     | 0.50        |
| Organ toxicity                             | Respiratory toxicity                                                                   | respi         | Active     | 0.58        |
| Organ toxicity                             | Cardiotoxicity                                                                         | cardio        | Inactive   | 0.79        |
| Toxicity end points                        | Carcinogenicity                                                                        | carcino       | Inactive   | 0.50        |
| Toxicity end points                        | Immunotoxicity                                                                         | immuno        | Inactive   | 0.65        |
| Toxicity end points                        | Mutagenicity                                                                           | mutagen       | Inactive   | 0.64        |
| Toxicity end points                        | Cytotoxicity                                                                           | cyto          | Inactive   | 0.67        |
| Toxicity end points                        | BBB-barrier                                                                            | bbb           | Inactive   | 0.57        |
| Toxicity end points                        | Ecotoxicity                                                                            | eco           | Inactive   | 0.78        |
| Toxicity end points                        | Clinical toxicity                                                                      | clinical      | Active     | 0.51        |
| Toxicity end points                        | Nutritional toxicity                                                                   | nutri         | Inactive   | 0.58        |
| Tox21-Nuclear receptor signalling pathways | Aryl hydrocarbon Receptor (AhR)                                                        | nr_ahr        | Inactive   | 0.93        |
| Tox21-Nuclear receptor signalling pathways | Androgen Receptor (AR)                                                                 | nr_ar         | Inactive   | 0.97        |
| Tox21-Nuclear receptor signalling pathways | Androgen Receptor Ligand Binding Domain (AR-LBD)                                       | nr_ar_lbd     | Inactive   | 0.99        |
| Tox21-Nuclear receptor signalling pathways | Aromatase                                                                              | nr_aromatase  | Inactive   | 0.97        |
| Tox21-Nuclear receptor signalling pathways | Estrogen Receptor Alpha (ER)                                                           | nr_er         | Inactive   | 0.92        |
| Tox21-Nuclear receptor signalling pathways | Estrogen Receptor Ligand Binding Domain (ER-LBD)                                       | nr_er_lbd     | Inactive   | 0.98        |
| Tox21-Nuclear receptor signalling pathways | Peroxisome Proliferator Activated Receptor Gamma (PPAR-Gamma)                          | nr_ppar_gamma | Inactive   | 0.95        |
| Tox21-Stress response pathways             | Nuclear factor (erythroid-derived 2)-like 2/ antioxidant responsive element (nrf2/ARE) | sr_are        | Inactive   | 0.97        |
| Tox21-Stress response pathways             | Heat shock factor response element (HSE)                                               | sr_hse        | Inactive   | 0.97        |
| Tox21-Stress response pathways             | Mitochondrial Membrane Potential (MMP)                                                 | sr_mmp        | Inactive   | 0.74        |
| Tox21-Stress response pathways             | Phosphoprotein (Tumor Suppressor) p53                                                  | sr_p53        | Inactive   | 0.93        |
| Tox21-Stress response pathways             | ATPase family AAA domain-containing protein 5 (ATAD5)                                  | sr_atad5      | Inactive   | 0.98        |
| Molecular Initiating Events                | Thyroid hormone receptor alpha (THR $\alpha$ )                                         | mie_thr_alpha | Inactive   | 0.83        |
| Molecular Initiating Events                | Thyroid hormone receptor beta (THR $\beta$ )                                           | mie_thr_beta  | Inactive   | 0.83        |
| Molecular Initiating Events                | Transthyretin (TTR)                                                                    | mie_ttr       | Inactive   | 0.63        |
| Molecular Initiating Events                | Ryanodine receptor (RYP)                                                               | mie_ryr       | Inactive   | 0.87        |
| Molecular Initiating Events                | GABA receptor (GABAR)                                                                  | mie_gabar     | Inactive   | 0.95        |
| Molecular Initiating Events                | Glutamate N-methyl-D-aspartate receptor (NMDAR)                                        | mie_nmdar     | Inactive   | 0.98        |
| Molecular Initiating Events                | alpha-amino-3-hydroxy-5-methyl-4-                                                      | mie_ampar     | Inactive   | 0.85        |

| Classification              | Target                                          | Shorthand  | Prediction | Probability |
|-----------------------------|-------------------------------------------------|------------|------------|-------------|
| Events                      | isoxazolepropionate receptor (AMPA)             |            |            |             |
| Molecular Initiating Events | Kainate receptor (KAR)                          | mie_kar    | Inactive   | 0.96        |
| Molecular Initiating Events | Achetylcholinesterase (AChE)                    | mie_ache   | Inactive   | 0.96        |
| Molecular Initiating Events | Constitutive androstane receptor (CAR)          | mie_car    | Inactive   | 1.0         |
| Molecular Initiating Events | Pregnane X receptor (PXR)                       | mie_pxr    | Inactive   | 0.61        |
| Molecular Initiating Events | NADH-quinone oxidoreductase (NADHox)            | mie_nadhox | Inactive   | 0.98        |
| Molecular Initiating Events | Voltage gated sodium channel (VGSC)             | mie_vgsc   | Inactive   | 0.52        |
| Molecular Initiating Events | Na <sup>+</sup> /I <sup>-</sup> symporter (NIS) | mie_nis    | Inactive   | 0.95        |
| Metabolism                  | Cytochrome CYP1A2                               | CYP1A2     | Inactive   | 0.97        |
| Metabolism                  | Cytochrome CYP2C19                              | CYP2C19    | Inactive   | 0.93        |
| Metabolism                  | Cytochrome CYP2C9                               | CYP2C9     | Inactive   | 0.52        |
| Metabolism                  | Cytochrome CYP2D6                               | CYP2D6     | Inactive   | 0.92        |
| Metabolism                  | Cytochrome CYP3A4                               | CYP3A4     | Inactive   | 0.91        |
| Metabolism                  | Cytochrome CYP2E1                               | CYP2E1     | Inactive   | 1.0         |

*Figure S1: Toxicity impact of compound 6d using ProTox 3.0 program.*

# *Molecular docking survey*

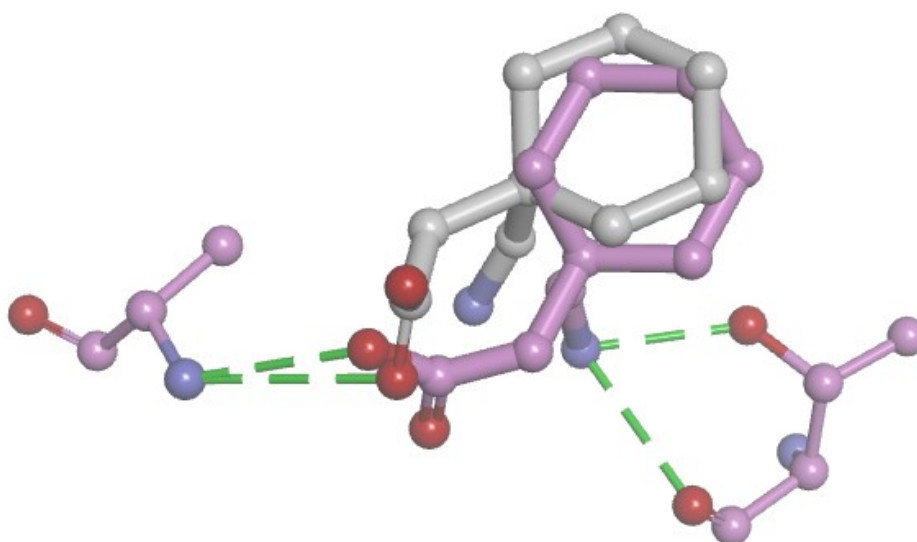

| mode | affinity<br>(kcal/mol) | dist from best mode<br>rmsd l.b. | rmsd u.b. |
|------|------------------------|----------------------------------|-----------|
| 1    | -5.5                   | 0.000                            | 0.000     |
| 2    | -5.2                   | 2.142                            | 3.012     |
| 3    | -5.0                   | 11.938                           | 13.072    |
| 4    | -4.9                   | 1.961                            | 2.784     |
| 5    | -4.9                   | 2.377                            | 3.152     |
| 6    | -4.8                   | 11.793                           | 12.482    |
| 7    | -4.8                   | 1.952                            | 2.452     |
| 8    | -4.7                   | 2.794                            | 3.591     |
| 9    | -4.7                   | 8.714                            | 10.064    |

Writing output ... done.

**Figure S2:** Superimposition of co-crystallized gabapentin (purple) and redocked gabapentin (white) for validation of docking protocol.

# *Experimental sections*

## 1 Chemistry

### 1.1 Synthesis of ethyl 5-(benzofuran-2-yl)-1-(4-sulfamoylphenyl)-1H-pyrazole-3-carboxylate (3). [1]

Ethyl 4-(benzofuran-2-yl)-2,4-dioxobutanoate **2** [2] (4 mmol, 0.88 g) was dissolved in 15 mL of acetic acid, followed by the addition of a solution of 4-aminosulfonylphenylhydrazine (4 mmol, 0.75 g) in 20 mL of EtOH. The reaction mixture was then refluxed for 3 h. Upon completion, the resulting precipitate was filtered, dried, and recrystallized from ethanol to afford compound **3**.

### 1.2 Synthesis of 4-(5-(benzofuran-2-yl)-3-(hydrazinecarbonyl)-1H-pyrazol-1-yl)benzenesulfonamide (4).

Ester **3** (10 mmol, 3.71 g) was refluxed in 10 mL of hydrazine hydrate and the reaction progress was monitored by TLC. After 3 h, upon completion of the reaction, the mixture was poured over ice and stirred for 3 hr, with a few drops of acetic acid added. The resulting precipitate **4** was filtered, dried, and recrystallized from EtOH.

### 1.3 Synthesis of 2-(5-(benzofuran-2-yl)-1-(4-sulfamoylphenyl)-1H-pyrazole-3-carbonyl)-N-phenylhydrazine-1-carboxamide (5)

Hydrazide compound **4** (1 mmol, 0.36 g) was refluxed in 10 mL of EtOH in the presence of phenyl isothiocyanate, with the progress of the reaction monitored by TLC. After 1 hr, upon completion of the reaction, the mixture was filtered and subsequently dried to yield tilted compound **5**.

### 1.4 Synthesis the final compounds (6a-e, 7a-f)

A solution of hydrazide **4** (1 mmol, 0.36 g) in 20 mL of ethanol was combined with the appropriate aldehydes or isatin (1 mmol) and a catalytic amount of acetic acid (0.5 mL). The mixture was then refluxed for 6 h. Upon completion, the precipitate that formed was filtered, and recrystallized from a EtOH to yield the target compounds **6a-e** and **7a-f**.

# *HPLC charts*

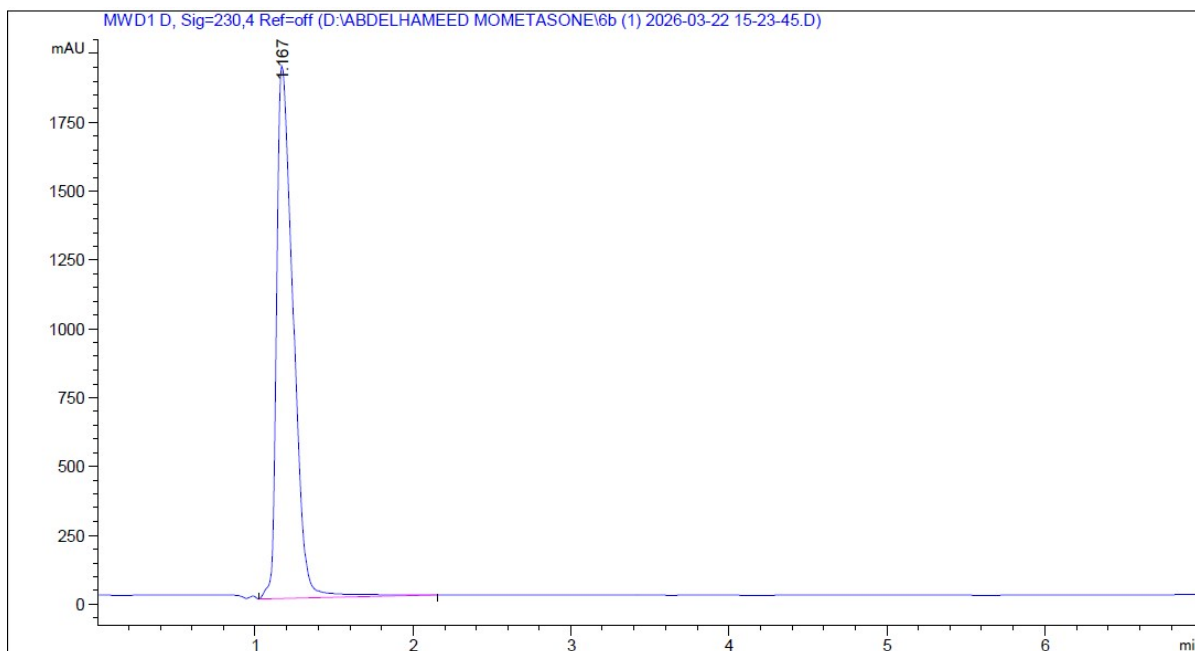

*HPLC chart of compound 6b*

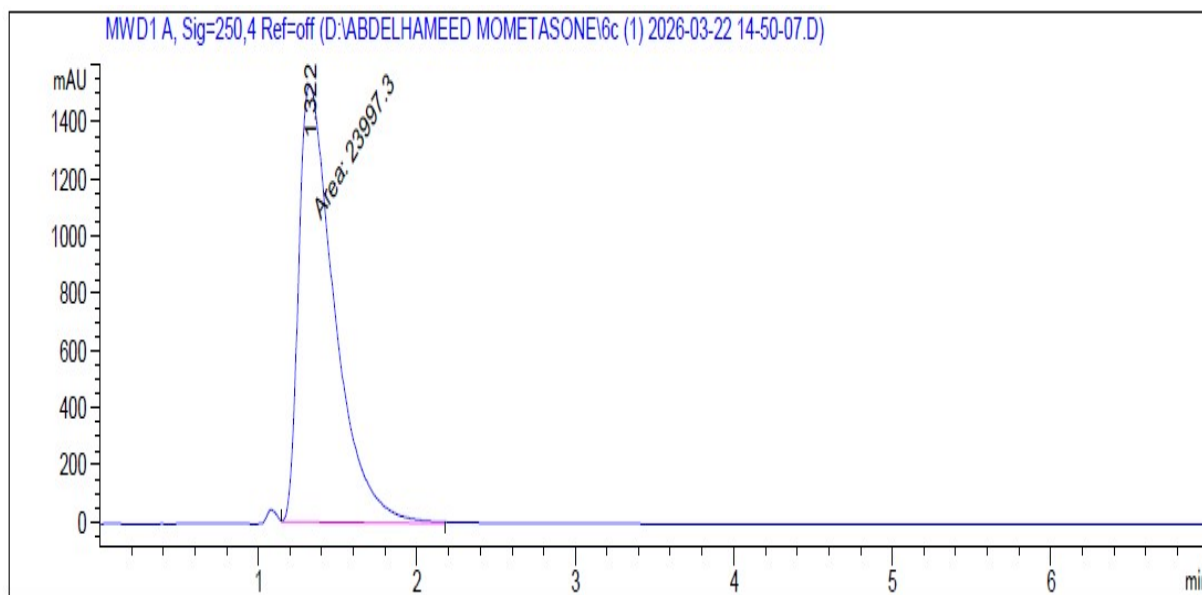

*HPLC chart of compound 6c*

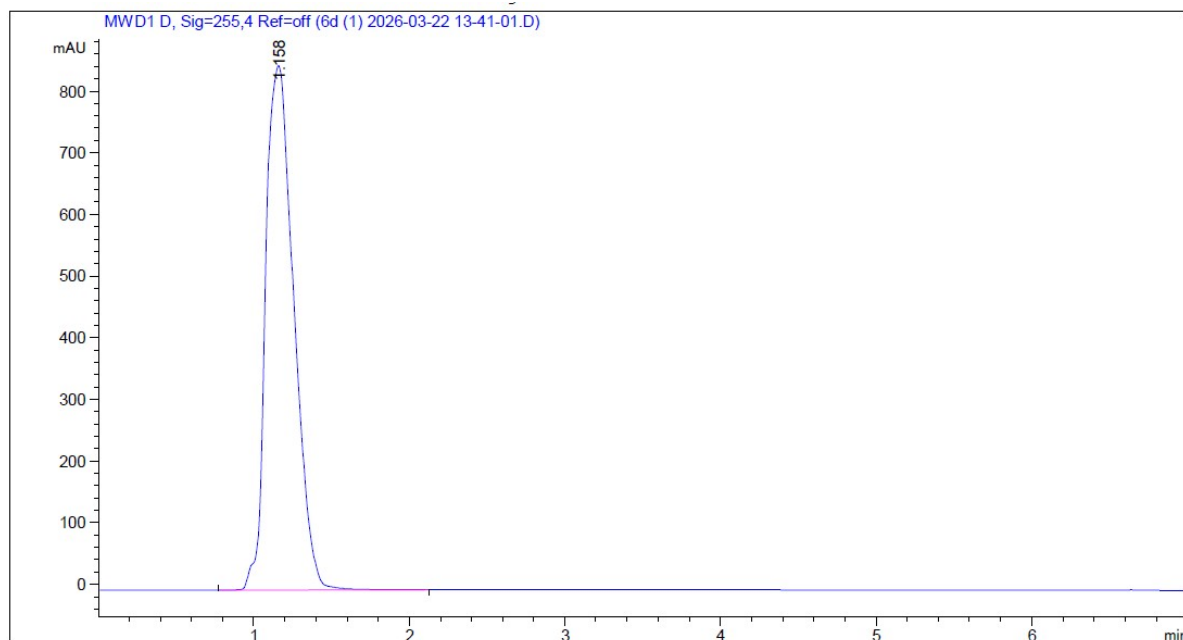

HPLC chart of compound 6d

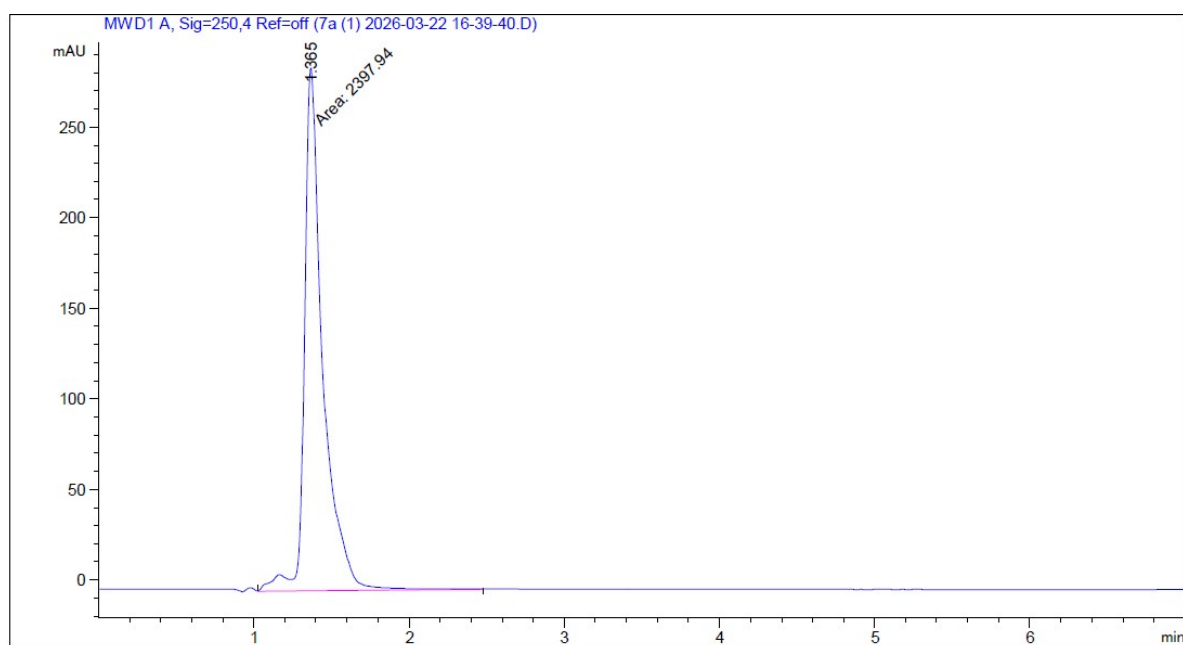

HPLC chart of compound 7a

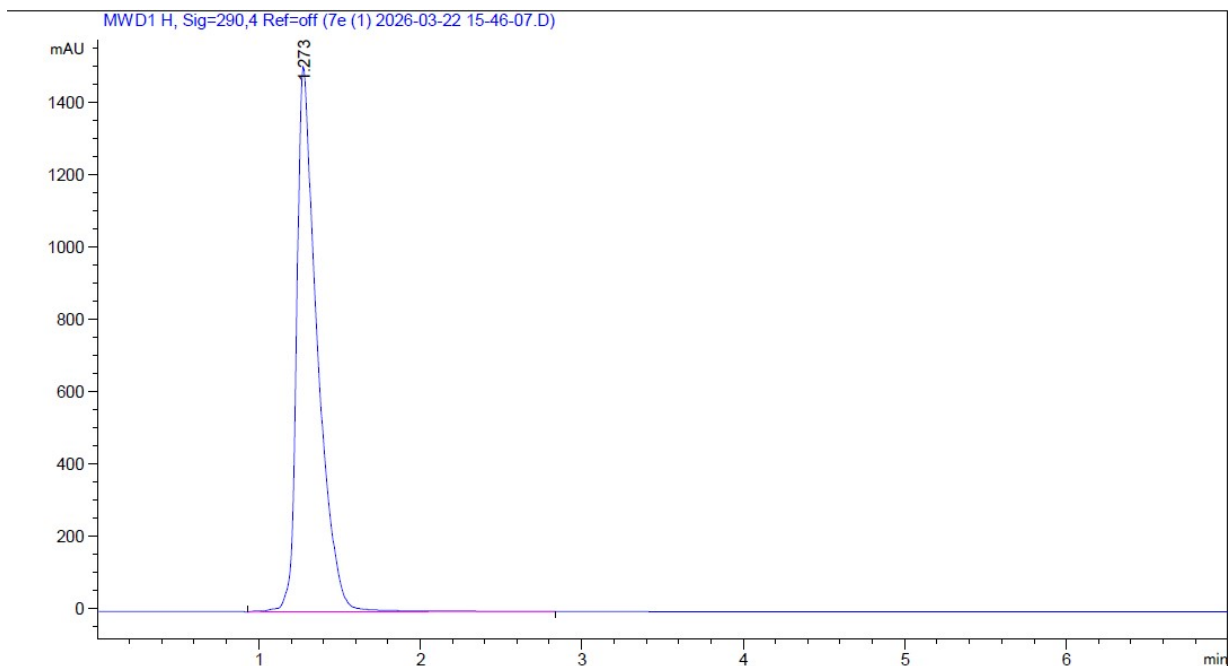

*HPLC chart of compound 7e*

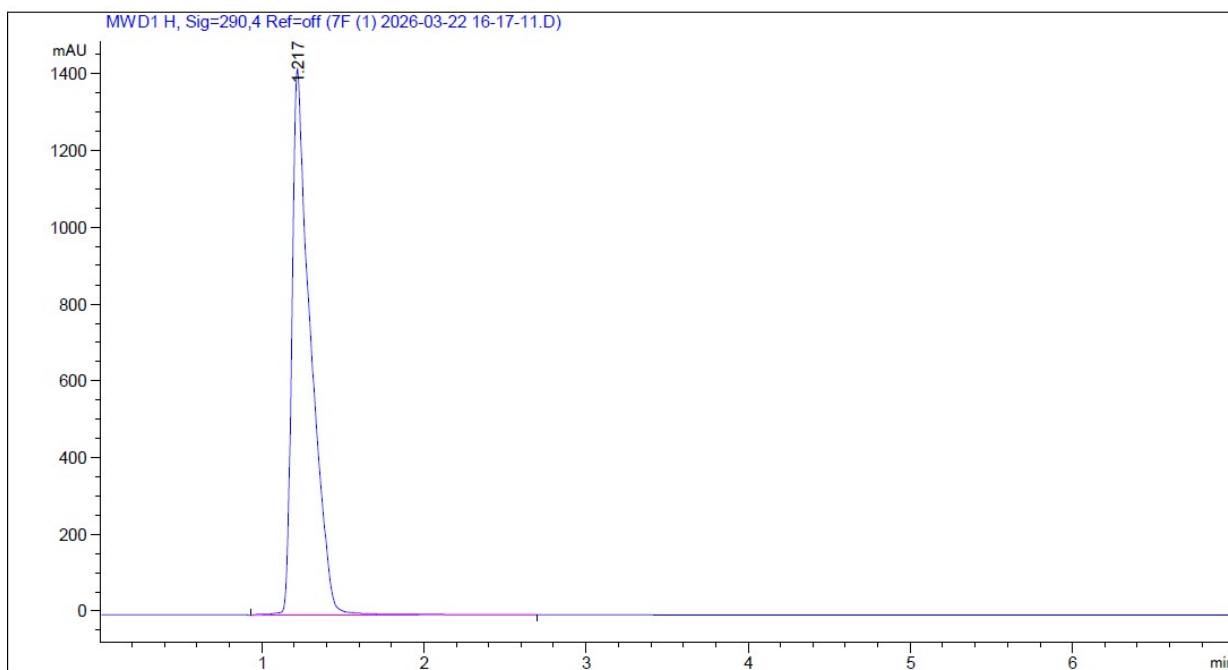

*HPLC chart of compound 7f*

# *Experimental procedures and instruments*

## 2 Material and methods

### 2.1 Bioinformatics study

#### 2.1.1 *Identification of related targets for anti-epilepsy and Prediction of compound targets*

Targets associated with anti-epilepsy were retrieved from GeneCards platform (<https://www.genecards.org/>). All genes retrieved from GeneCards were used as the input gene set. Initially, 2086 genes were collected. After merging and filtering, the final gene set contained 1853 genes. Some genes had low GeneCards scores, but their names were still included; no additional score-based filtering was applied. This final set was used for downstream analyses. The potential molecular targets of the active compounds (**6b**, **6c**, **6d**) and (**7a**, **7e**, **7f**) were predicted using Swiss Target (<http://www.swisstargetprediction.ch/>), Prediction with Homo sapiens selected as the target species. For each compound, the top 100 predicted targets ranked by probability score were retained for subsequent analysis. specifying homo sapiens as the target species. The intersection of anti-epilepsy -related targets and compound-associated targets was determined and visualized using VENNY 2.1.0 (<https://bioinfogp.cnb.csic.es/tools/venny/>), to identify common targets potentially involved in the antiepileptic activity of the compounds. These overlapping genes were considered the input gene set for subsequent enrichment analysis and downstream target prioritization.

#### 2.1.2 *Gene ontology (GO) functional annotation and Kyoto Encyclopedia of Genes and genomes (KEGG) pathway analysis*

The GO functional annotation and KEGG pathway enrichment analyses were performed using the ShinyGO platform. (<http://bioinformatics.sdstate.edu/go/>) is a web-based tool designed for the analysis of gene expression data, focusing on GO terms, pathway analysis, and protein–protein interaction networks. To evaluate the predicted antiepileptic effects of the investigated compounds, enrichment analyses were performed using KEGG biological process enrichment analysis of predicted target genes associated with the investigated compounds (nGenes indicates the number of predicted target genes involved in each pathway), GO biological processes, and GO molecular functions. Pathways with a false discovery rate (FDR) < 0.05 were considered statistically significant

## 2.2 Experimental animals

Male Swiss albino mice weighing 23-27 g were used in this study. The animals were housed in standard polypropylene cages under controlled laboratory conditions: ambient temperature  $22 \pm 2$  °C, relative humidity 50-60%, and a 12-hour light/dark cycle. Standard rodent pellet chow and water were provided ad libitum throughout the experiment. To minimize stress and allow physiological acclimatization, mice were allowed to adapt to the laboratory environment for one week prior to any experimental procedures. All animal experiments were conducted in accordance with institutional and national ethical guidelines for animal research and were approved by the Ethics Committee of the Faculty of Pharmacy, Egyptian Russian University (Approval Code: ERUFP-PC-25-001).

## 2.3 PTZ-induced seizure model

For the PTZ screen, a total of 80 mice were randomly divided into eight groups (10 mice per group). The groups were organized as follows: (1) a PTZ control group receiving 0.5% carboxymethyl cellulose (CMC) vehicle orally, 30 minutes prior to PTZ injection; (2) a reference group treated with sodium valproate (300 mg/kg, p.o., as a positive control); and (3-8) six test groups administered with compounds **6b**, **6c**, **6d**, **7a**, **7e**, and **7f** (20 mg/kg, p.o. for each compound). Thirty minutes after the pretreatment, all groups (except the normal vehicle control) were challenged with a convulsive dose of pentylenetetrazol (85 mg/kg, i.p.) to induce seizures. Following PTZ administration, mice were placed individually in transparent observation chambers, and an observer blinded to the treatment recorded seizure activity for each animal.

The anticonvulsant efficacy of each treatment was quantified by assessing: (a) the seizure protection rate, defined as the percentage of mice in the group that did not develop generalized tonic-clonic seizures; (b) the relative protection compared to the valproate reference group, reflecting the potency of each test compound in preventing seizures relative to the standard drug; and (c) the mortality rate within 24 hours post-PTZ, as an indicator of severe seizure outcomes.

## 2.4 Pilocarpine-induced seizure model

Mice were assigned to nine groups (n = 10 per group) for this phase: (1) a normal control group that received vehicle (no pilocarpine) and served as a baseline; (2) a pilocarpine control group that was given pilocarpine (300 mg/kg, i.p.) to induce status epilepticus; (3) a sodium

valproate group (300 mg/kg, p.o.) serving as a positive control; and (4-9) six experimental groups pretreated with the test compounds (each at 20 mg/kg, p.o.). All mice, except those in the normal control group, were injected with pilocarpine (300 mg/kg, i.p.) to induce seizures, 30 minutes after administration of either valproate or test compounds. To mitigate peripheral cholinergic effects of pilocarpine, all animals receiving pilocarpine were pretreated with the peripheral muscarinic antagonist hyoscine butylbromide (1 mg/kg, i.p.) 20 minutes before the pilocarpine injection.

Following pilocarpine administration, animals were observed for a 120-minute period for signs of seizures. Seizure activity was evaluated by recording: (a) the latency to seizure onset, defined as the time (in minutes) from pilocarpine injection to the first appearance of a Stage 3 seizure (forelimb clonus) on the Racine scale; (b) the seizure severity progression, monitored by scoring each animal's seizure activity at 30-minute intervals according to Racine's five-point scale (0 = no response, 1 = facial automatisms, 2 = head nodding, 3 = forelimb clonus, 4 = rearing and falling, 5 = generalized tonic-clonic seizure); and (c) the 24-hour survival rate for each group following status epilepticus, as a measure of protection against lethal seizures. At the end of the 2-hour observation period, animals that survived were humanely euthanized, and the brains were quickly removed to harvest hippocampal tissues from select groups for biochemical analysis. In this study, hippocampal samples were collected from the normal control group, the pilocarpine control group, valproic acid group, and the group treated with the most effective test compound (6d). These tissue samples were immediately frozen and later processed for assays to investigate the compound's effect on neurochemical markers of seizure-induced damage.

## **2.5 Evaluation of hippocampal biochemical changes**

Hippocampal oxidative stress was evaluated by measuring the levels of malondialdehyde (MDA) and nitric oxide (NO) in tissue homogenates. MDA was quantified as an index of lipid peroxidation, whereas NO levels were determined indirectly by assessing its stable metabolite, nitrite, using the Griess reaction. Both MDA and nitrite concentrations were measured with commercially available colorimetric assay kits (Biodiagnostics Co., Giza, Egypt) according to the protocols provided by the manufacturer.

To investigate excitotoxic and inflammatory responses in the hippocampus, the concentrations of glutamate (an excitatory neurotransmitter) and pro-inflammatory cytokines

tumor necrosis factor- $\alpha$  (TNF- $\alpha$ ) and interleukin-6 (IL-6) were determined in the harvested tissue. These biomarkers were quantified using specific enzyme-linked immunosorbent assay (ELISA) kits: glutamate was measured with a competitive ELISA kit (MyBioSource, San Diego, CA, USA; Cat# MBS756400), while TNF- $\alpha$  and IL-6 were measured with sandwich ELISA kits (TNF- $\alpha$ : CUSABIO, Houston, TX, USA; Cat# CSB-E11987r; IL-6: R&D Systems, Minneapolis, MN, USA; Cat# R6000B). Hippocampal tissue homogenates were prepared and centrifuged at  $12,000 \times g$  for 15 minutes at 4 °C, and the resulting supernatants were used for the assays according to the kit manufacturers' instructions. Total protein content in each sample was determined by the biuret method to allow normalization of glutamate and cytokine levels per milligram of protein.

## **2.6 Toxicity and safety evaluation**

The safety profile of the lead compound 6d was examined using a sub-chronic dosing regimen in mice. Male mice were administered 20 mg/kg, p.o. doses of 6d once daily for 14 consecutive days, while control animals received the vehicle alone (0.5% CMC, p.o.). Throughout the treatment period, all mice were closely monitored for any signs of toxicity, such as changes in general behavior, signs of discomfort or distress, and any mortality. At the end of the 14-day dosing period, all animals were anesthetized for blood collection via retro-orbital sinus puncture. Blood samples were allowed to clot and then centrifuged at 3000 rpm for 10 minutes to separate serum. The obtained serum was analyzed for key biochemical markers of organ function using standard diagnostic kits. Liver function was evaluated by measuring the activities of alanine aminotransferase (ALT) and aspartate aminotransferase (AST) with kinetic enzyme assay kits (Spectrum Diagnostics, Cairo, Egypt). Renal function was assessed by determining serum urea and creatinine levels (Spectrum Diagnostics kits), and potential cardiotoxicity was examined by measuring serum creatine kinase-MB (CK-MB) and troponin T levels by ELISA kits from LSBio (Cat# LS-F5746) and MyBioSource (Cat# MBS730382), respectively.

## **2.7 Animals Section**

Animals were randomly allocated to experimental groups using simple randomization. Investigators responsible for seizure scoring and outcome assessment were blinded to treatment allocation during the experiment and data analysis. The approval code is: ERUFP-PC-24-001.

## **2.8 End of Statistical Analysis**

For the carrageenan-induced paw edema model, celecoxib was used as reference anti-inflammatory drug, and comparisons were made against the carrageenan and celecoxib control groups. For the PTZ- and pilocarpine-induced seizure models, sodium valproate was used as the positive anticonvulsant control, and comparisons were made against the corresponding disease-control groups. For hippocampal biochemical analyses, normal control, pilocarpine control, valproic acid, and compound 6d groups were compared to assess seizure-associated oxidative stress, neuroinflammation, and excitotoxicity.

## **2.9 HPLC results**

HPLC analysis was performed using an HPLC system (Agilent 1260 Infinity II, Agilent Technologies Inc., USA) equipped with an Agilent Eclipse XDB-C8 column (5  $\mu\text{m}$ ). All compounds were dissolved in methanol and injected at a volume of 20  $\mu\text{L}$ . Detection was carried out at the  $\lambda_{\text{max}}$  of each compound to ensure optimal sensitivity. The mobile phase composition was optimized individually for each compound to achieve adequate retention and peak separation, while a constant flow rate of 1.5 mL/min was maintained. Under these conditions, each compound produced a well-defined single peak, indicating suitable chromatographic performance and suggesting high purity of the compounds.

## 2.10 *In-silico* ADME study

The physicochemical descriptors, along with the predicted pharmacokinetic and drug-likeness profiles of the synthesized compounds, were assessed using the SwissADME and ProTox 3.0 web servers. In the early stages of drug development, it is imperative to evaluate these properties, as they play a critical role in determining the success of a candidate compound. Beyond potency, the absorption, distribution, metabolism, excretion, and toxicity (ADMET) characteristics, as well as overall drug-likeness, are essential considerations in optimizing lead compounds for further development. These parameters help predict the compound's behavior in biological systems, thereby facilitating the selection of candidates with favorable pharmacological profiles, in addition the target prediction survey was conducted with SwissTargetPrediction

## 2.11 Molecular Docking Studies

Molecular docking was employed to investigate the interactions between the synthesized ligands and the target protein, in comparison with a standard drug. Docking simulations were performed using the crystal structure of reduced human cytosolic branched-chain aminotransferase (VGSCs; PDB ID: 2COJ), obtained from the RCSB Protein Data Bank (<https://www.rcsb.org/>) in PDB format. Molecular docking was carried out using AutoDock 4.2 software. The resulting protein–ligand interaction complexes were visualized, and 2D interaction diagrams were generated using BIOVIA Discovery Studio Visualizer to analyze binding modes and key interacting residues

## Reference

- [1] E.M. Gedawy, A.E. Kassab, A.M. El Kerdawy, Design, synthesis and biological evaluation of novel pyrazole sulfonamide derivatives as dual COX-2/5-LOX inhibitors, *European Journal of Medicinal Chemistry* 189 (2020) 112066. <https://doi.org/10.1016/j.ejmech.2020.112066>.
- [2] Y. Gao, S. Samanta, T. Cui, Y. Lam, Synthesis and in vitro evaluation of west Nile virus protease inhibitors based on the 1,3,4,5-tetrasubstituted 1H-Pyrrol-2(5H)-one scaffold, *ChemMedChem* 8 (2013) 1554–1560. <https://doi.org/10.1002/cmdc.201300244>.
